# Supplementary material for: Free Cholesterol Accelerates Aβ Self-Assembly on Membranes at Physiological Concentration
Source: MDPI journal article supplement (doi:10.3390/ijms23052803), 2022-03-03
Supplement: s1 [file s1]

**Free cholesterol accelerates A $\beta$  self-assembly on membranes at physiological concentration**

Mohtadin Hashemi<sup>1,†</sup>, Siddhartha Banerjee<sup>1,2,†</sup>, and Yuri L. Lyubchenko<sup>1\*</sup>

<sup>1</sup>Department of Pharmaceutical Sciences, University of Nebraska Medical Center, 986025  
Nebraska Medical Center, Omaha, NE 68198-6025

<sup>2</sup>Current affiliation: Department of Chemistry and Biochemistry, The University of Alabama,  
Shelby Hall, Tuscaloosa, AL 35487

<sup>†</sup>These authors contributed equally.

\* Corresponding author e-mail: [ylyubchenko@unmc.edu](mailto:ylyubchenko@unmc.edu)

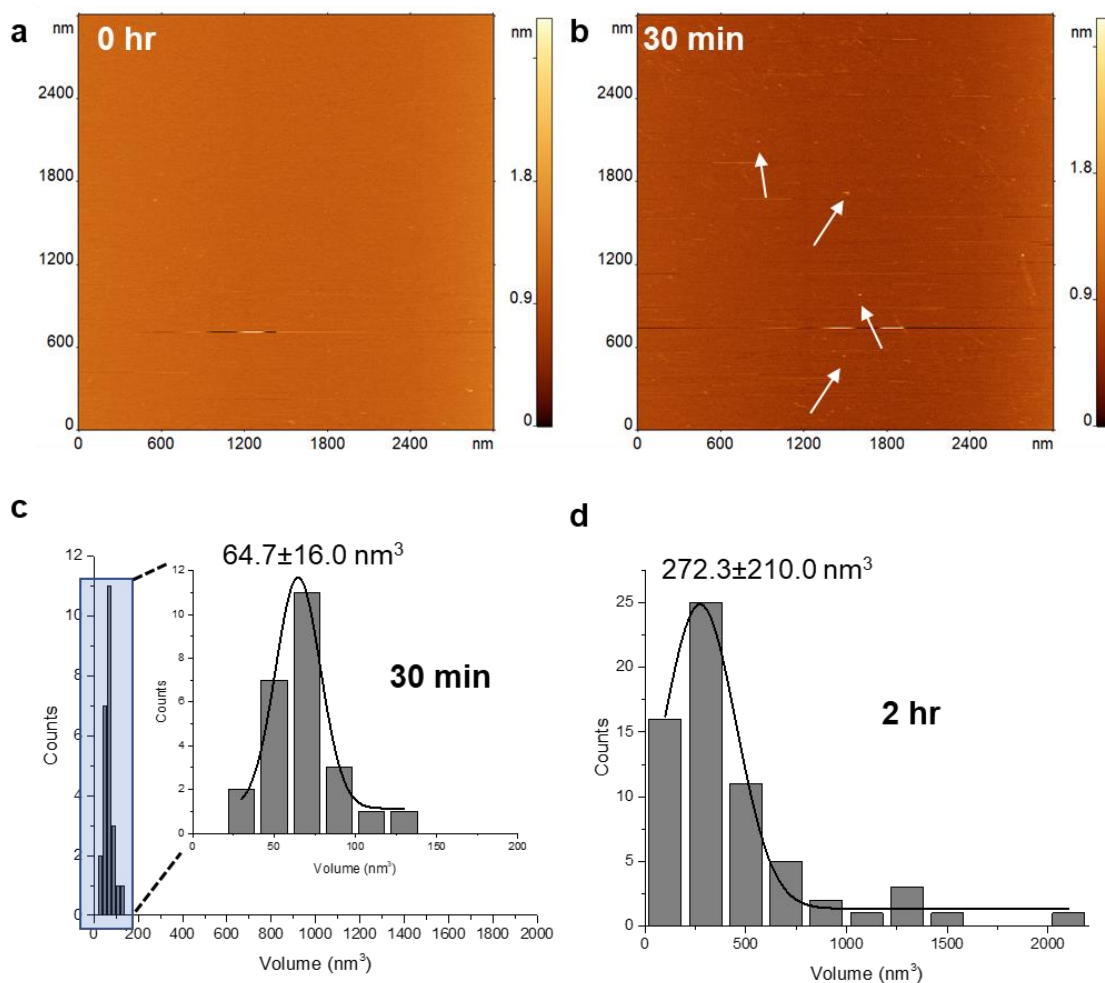

**Figure S1.** Aggregation of 10 nM Aβ(1-42), in the presence of 100 nM Chol, on PC-PS-Chol bilayer. **A)** AFM image of PC-PS-Chol lipid bilayer before addition of Aβ(1-42)-Chol solution. The smooth, homogeneous bilayer surface is ideal for monitoring the aggregation events. **B)** The same area of the surface after 30 min following the addition of Aβ(1-42)-Chol solution. Small aggregates are visible on surface (highlighted with white arrows). The distribution of aggregate volumes after 30 min, **c)**, and 2 hr, **d)**. Peak values obtained using Gaussian fits are presented in the histograms; errors indicate standard deviation.

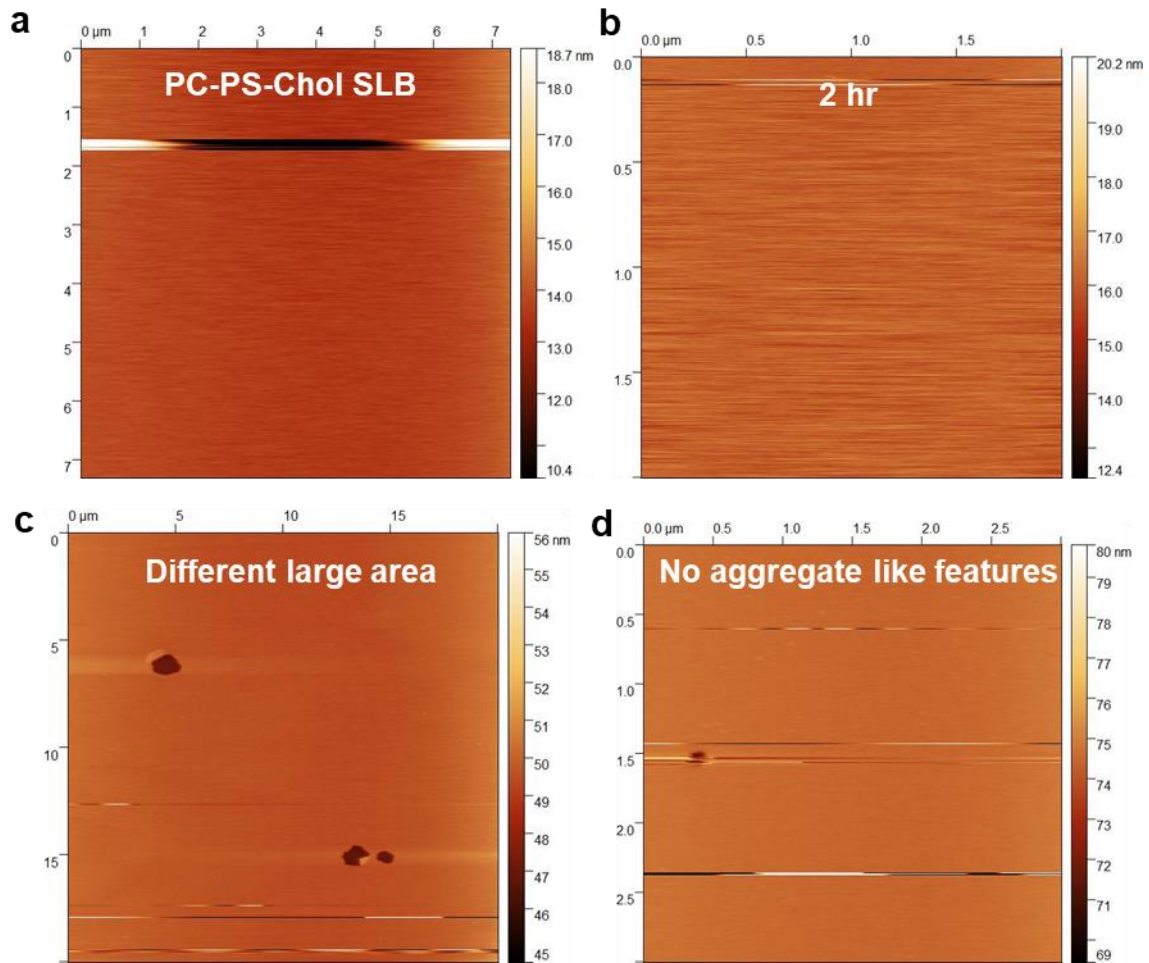

**Figure S2.** Time-lapse images of PC-PS-Chol bilayer in presence of 100 nM Chol. **a)** The PC-PS-Chol bilayer surface before addition of Chol solution. **b)** Bilayer surface 2 hr after addition of Chol solution. No aggregate-like features are observed. **c)** A large-scale image of a different area of the bilayer surface after 2 hr incubation with Chol solution. **d)** Zoom of **c** to check for aggregate-like features.

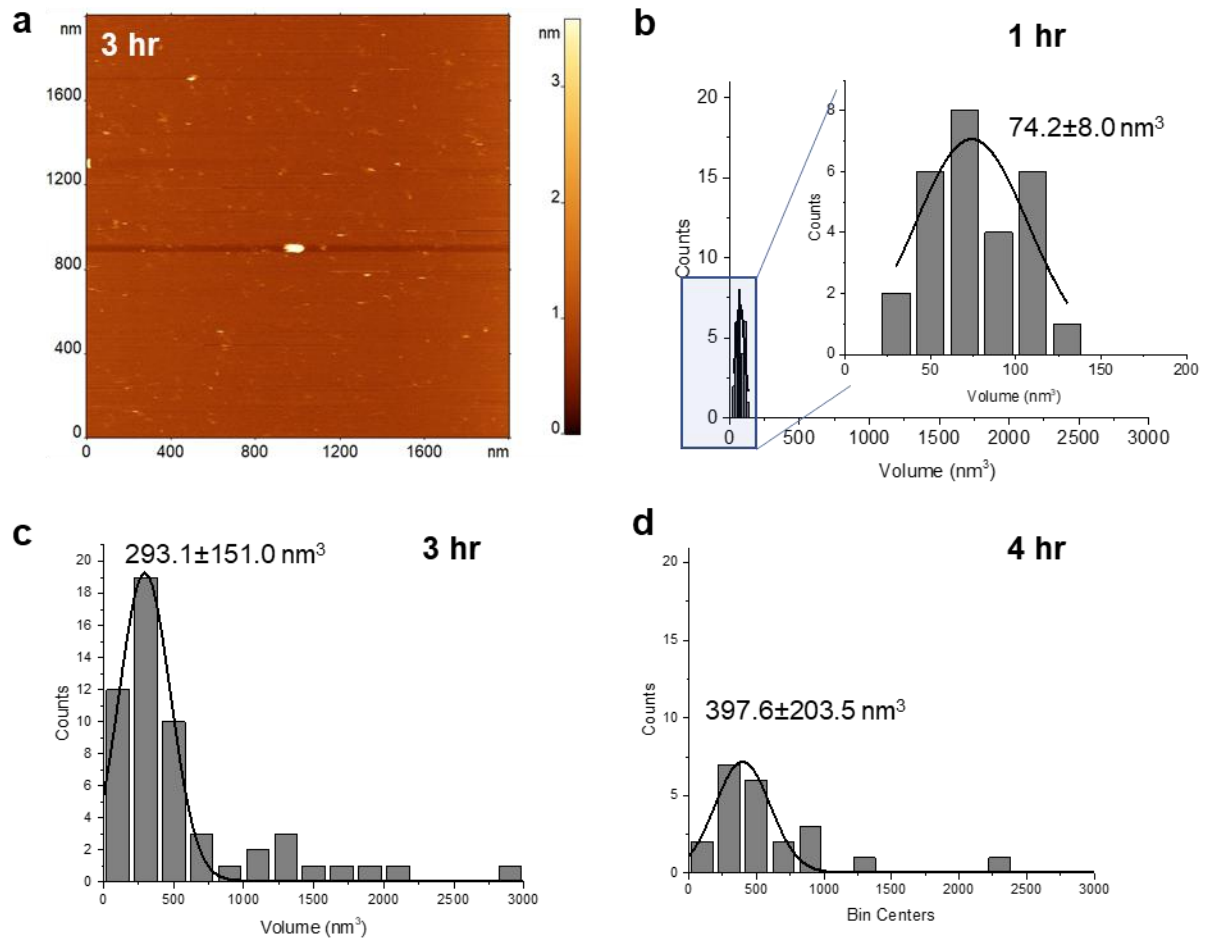

**Figure S3.** Dynamics of Aβ(1-42) aggregation on the PC-PS-Chol bilayer. **a)** AFM image of the bilayer surface recorded 3 hr after addition of Aβ(1-42)-Chol solution. **b-d)** Bar diagrams showing the distribution of aggregate volumes at different incubation time points.

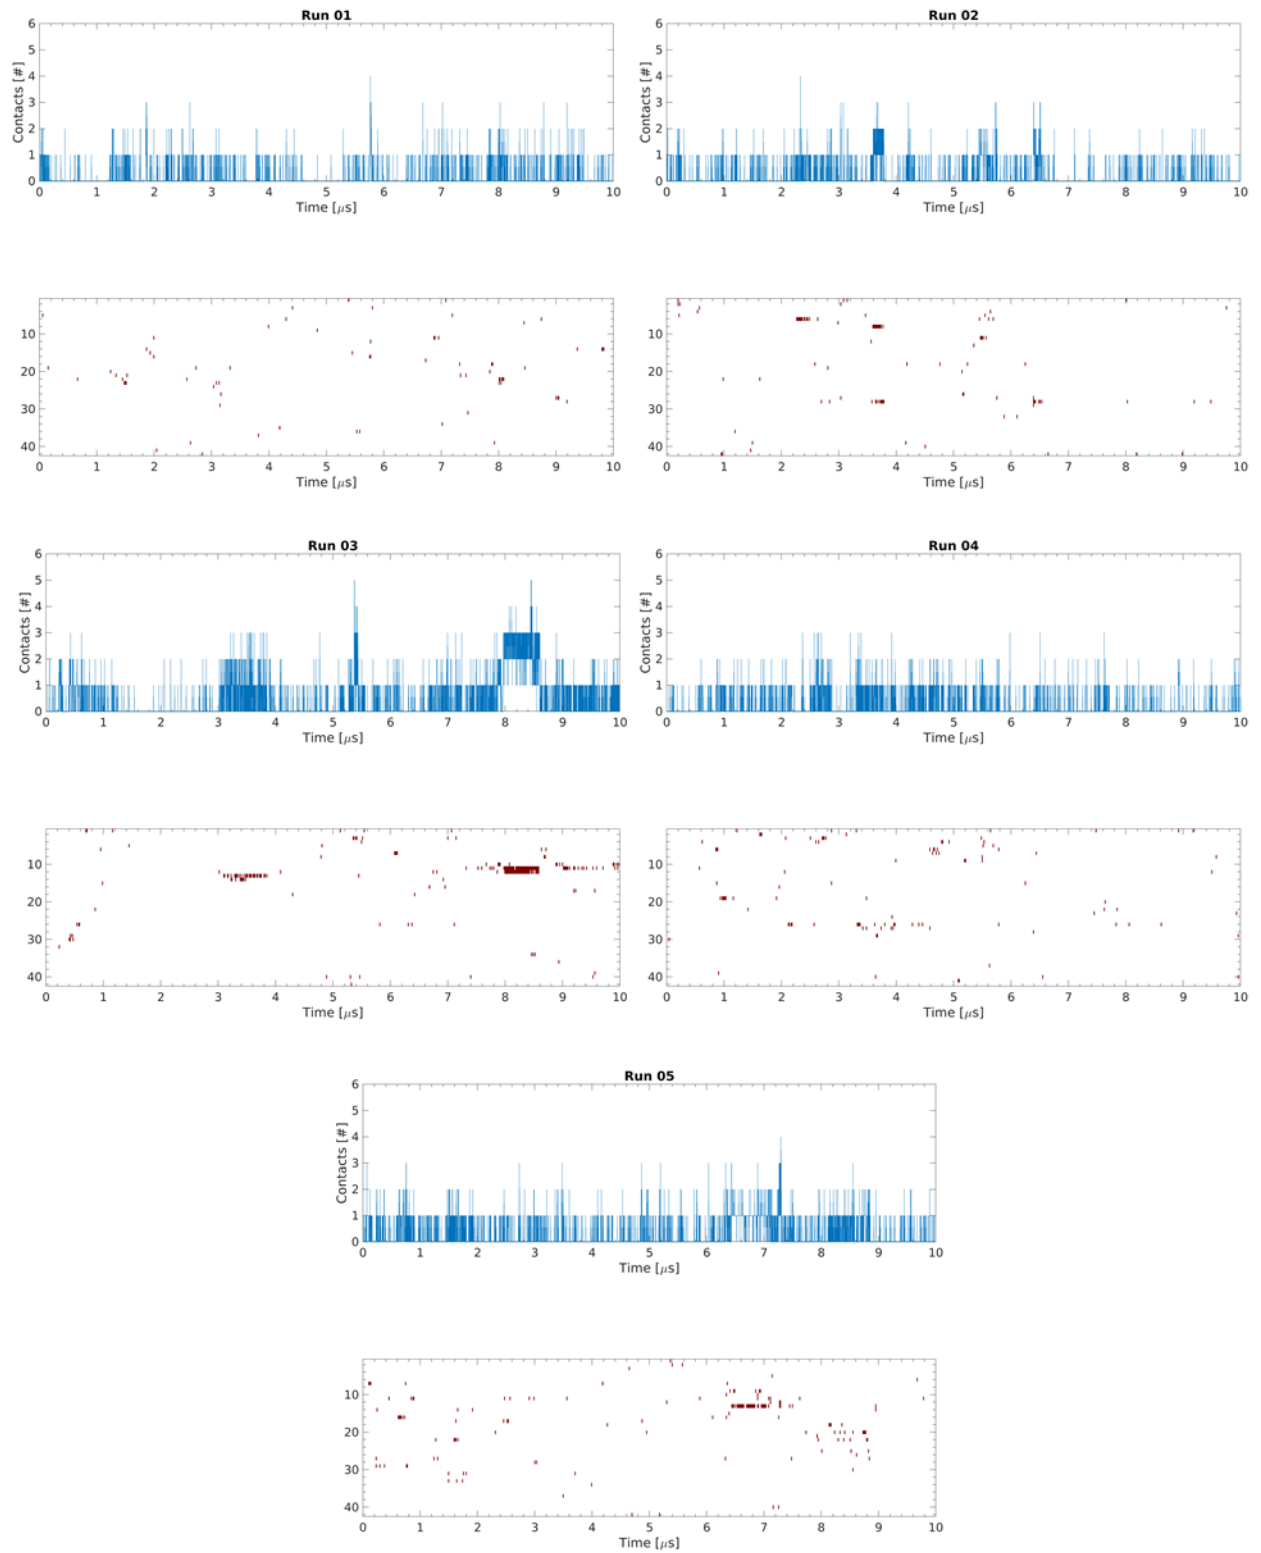

**Figure S4.** Aβ(1-42)-Chol contacts. Evolution of contacts between Chol molecule and residues of Aβ(1-42) monomer for each simulation. Blue graphs show cumulative contacts while the red kymographs show which Aβ(1-42) residues are responsible for contact.

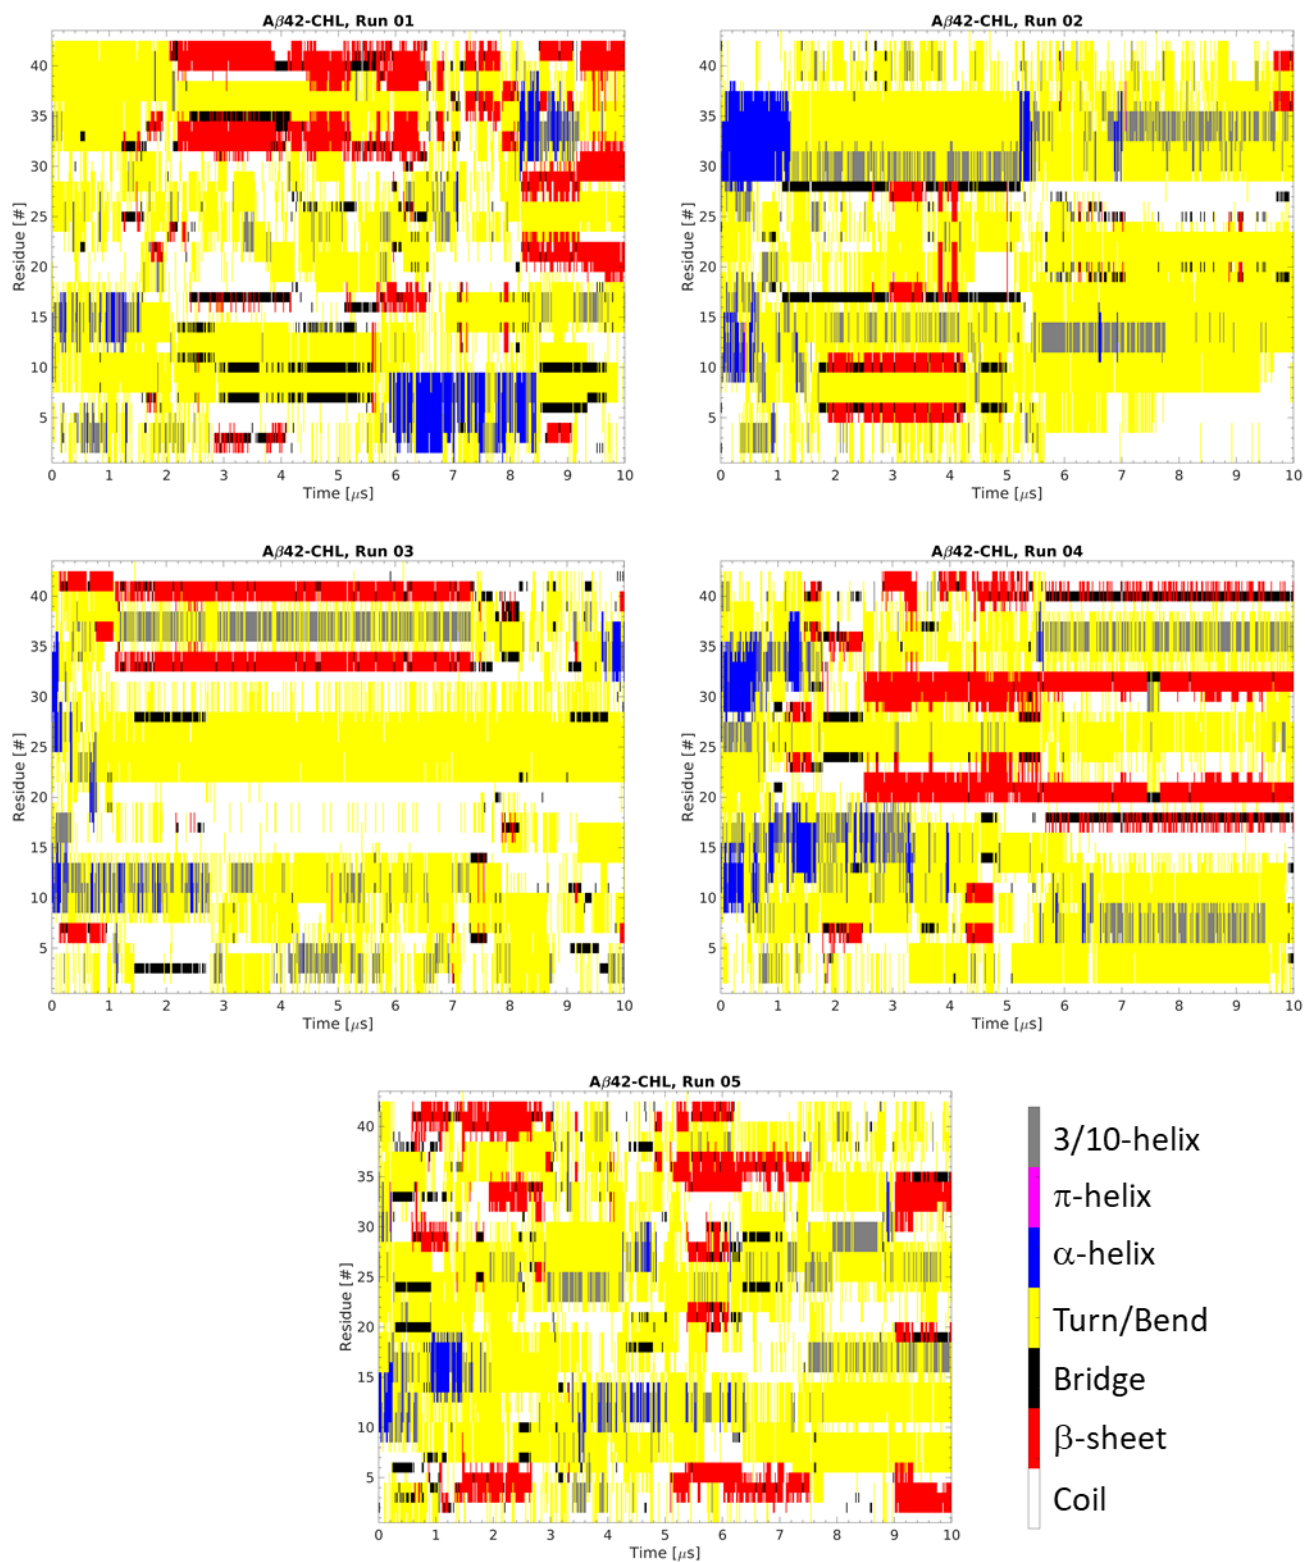

**Figure S5.** Secondary structure maps for Aβ(1-42) monomer interacting with Chol. Each map represents one simulation.

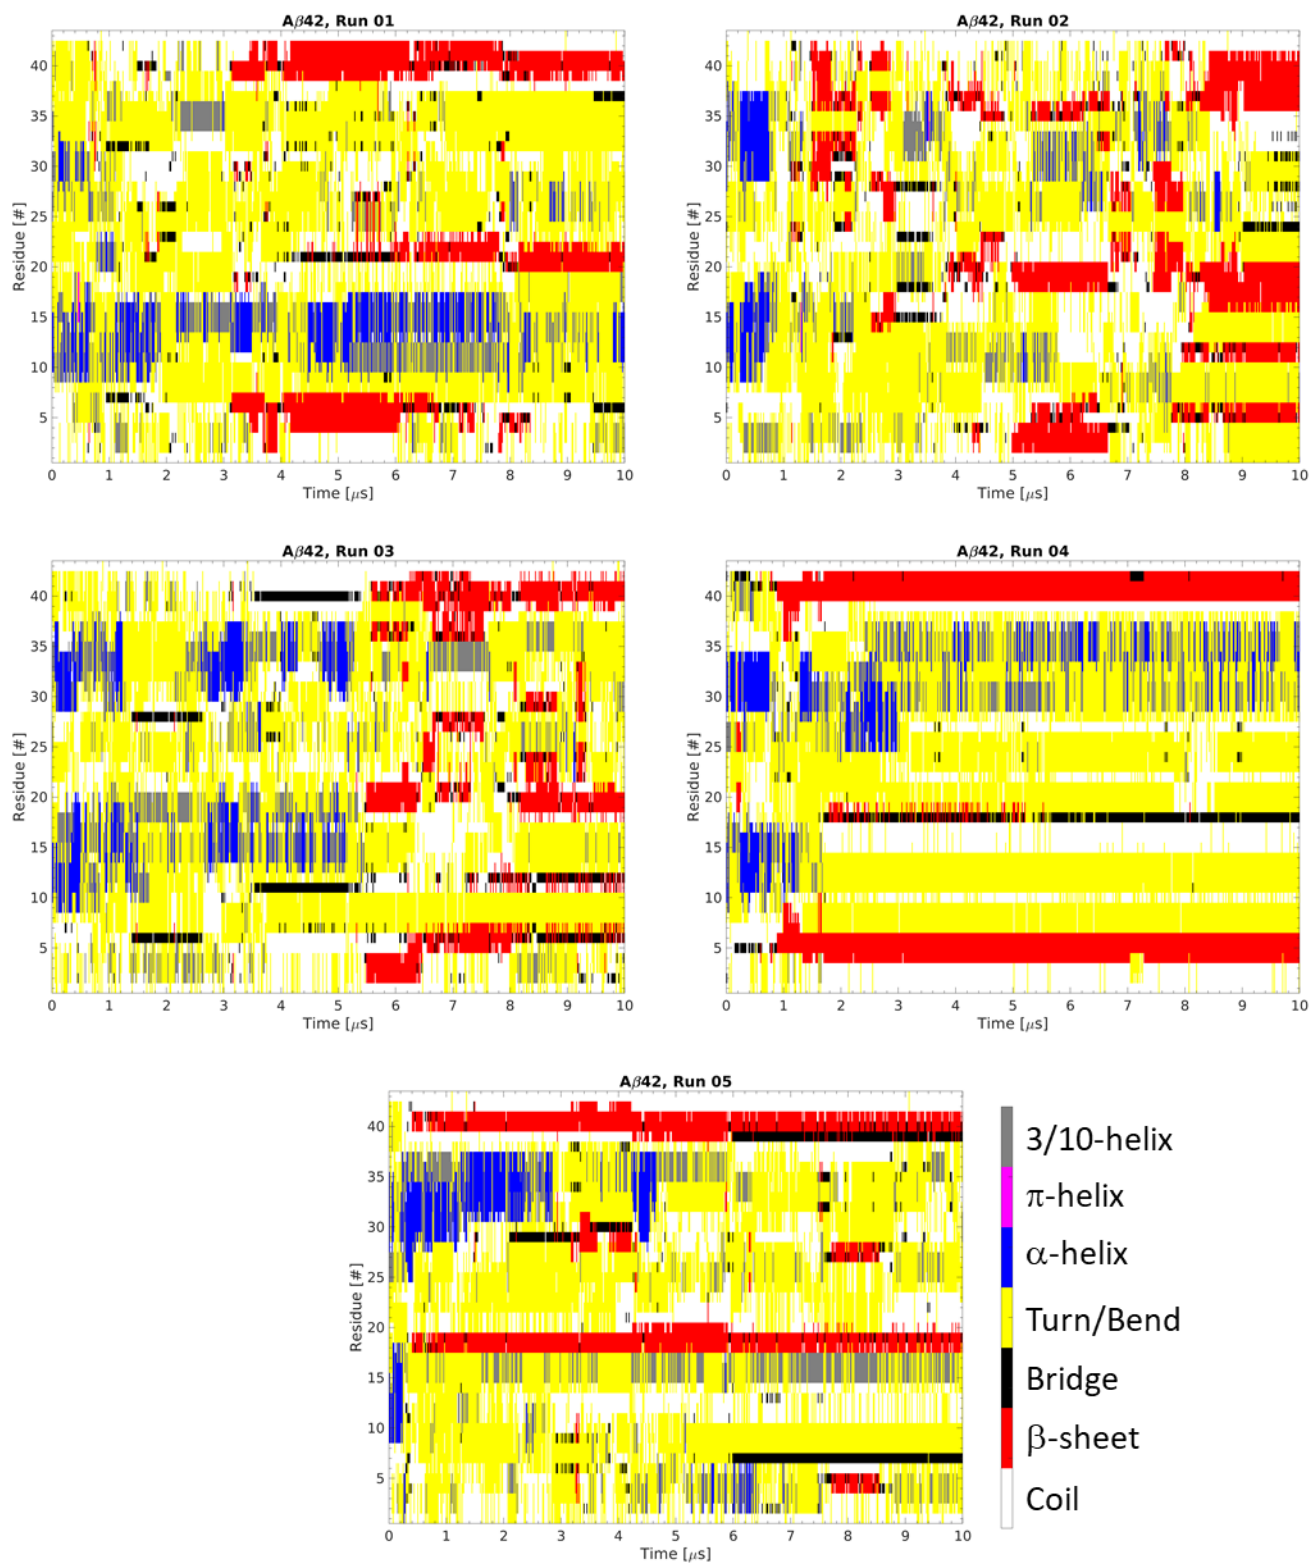

**Figure S6.** Secondary structure maps for A $\beta$ (1-42) monomer. Each map represents one simulation.
